# Supplementary material for: Investigating the Influence of Fiber Content and Geometry on the Flexural Response of Fiber-Reinforced Cementitious Composites.
Source: Preprints.org preprint supplement (doi:10.20944/preprints202407.2332.v1), 2024-07-29
Supplement: Supplementary file 1 [file supplementary]

## Sheet: Sheet1
Data Collected from the other references
																	Max	Min.
(G. Ramakrishna and Sundararajan Thirumalai, 2005)	Parameters	Vf %	L/d	f'c	T	fcr	MOR	MOR/fcr		Vf	Volume fraction of fibers						2.5	0		without
	Plain	0	0	48.5387	0	4.27471	0	0		L/d	Aspect ratio of fibers						3750	0		Normalized
	A	0.5	100	51.3655	1100	6.82	7.79	1.14141		f'c	Compressive strength of matrix reinforced with fibers Mpa						220	10.12		Normalized
	B	0.5	40	48.4697	1000	4.92971	4.93	1		T	Tensile strength of the fibers Mpa						4000	0		Normalized
	C	0.5	65	47.0908	1000	5.34	5.17	0.967742		fcr	First cracking strength Mpa						17.7	2.999
	D	0.5	625	41.87	550	5.308	5.31	1		MOR	Modulus of rupture (maximum post cracking stress of FRCC)						50.9	0
	Plain	0	0	48.5387	0	4.27471	0	0		MOR/fcr	Ratio of Mod.of rupture to Limit of Proportionality						3.75	0		without
	A	1	100	57.5018	1000	8.13	9.79	1.20339
	B	1	40	47.0908	1000	6.06734	6.07	1
	C	1	65	41.8508	1000	5.65365	5.65	1.10067
	D	1	65	38.246	1000	4.69	5.136	1
	B	1.5	40	48.3318	1000	6.96365	6.96	1
	C	1.5	65	38.8172	1000	6.067	7.34	1.21023
	B	2	40	35.7835	1000	6.17076	6.205	1.00559
	C	2	65	38.1277	1000	6.41	7.72	1.2043
	D	2	625	10.12	550	2.999	3.033	1.01149
(Naaman, 2018)		1.5	90.9091	55	500	5.8	6.8	1.17241
		0.5	90.9091	55	500	5.8	3	0.517241
		2	100	105	1600	12	35	2.91667
		1.5	100	105	1600	12	31	2.58333
		1	100	105	1600	12	25	2.08333
		2.5	65	201	2600	8	30	3.75
(BAŞSÜRÜCÜ et al., 2022)	Plain	0	0	37.1	0	8.9	0	0
	HL 7 days	0.4	66	36.5	1150	8.9	9.76	1.09663
	SS 7 days	0.4	40	25.1	3000	8.9	9.1	1.02247
	PP 7 days	0.4	240	17.5	350	8.9	7.95	0.893258
	HL 7 days	0.8	66	30.5	1150	8.9	11.05	1.24157
	SS 7 days	0.8	40	22.1	3000	8.9	8.65	0.97191
	PP 7 days	0.8	240	16.2	350	8.9	5.38	0.604494
	Plain	0	0	41.1	0	9.82	0	0
	HL 28 day	0.4	66	40.8	1150	9.82	10.61	1.08045
	SS 28 day	0.4	40	43.5	3000	9.82	10.25	1.04379
	PP 28 day	0.4	240	30.1	350	9.82	9.04	0.92057
	HL 28 day	0.8	66	41.7	1150	9.82	12.8	1.30346
	SS 28 day	0.8	40	45.2	3000	9.82	9.2	0.936864
	PP 28 day	0.8	240	28.1	350	9.82	6.54	0.665988
(Li et al., 2018b)	PC	0	0	47.53	1300	13.885	0	0
	Str Steel F	0.5	60	49.35	1300	13.885	13.704	0.986964
	Str Steel F	1	60	51.44	1300	13.88	16.091	1.15929
	Str Steel F	1.5	60	53.21	1300	13.88	19.501	1.40497
	Str Steel F	2	60	52.25	1300	13.88	24.201	1.74359
	Hook End	0.5	60	50.76	1195	13.88	14.267	1.02788
	Hook End	1	60	51.92	1195	13.88	29.386	2.11715
	Hook End	1.5	60	53.65	1195	13.88	33.306	2.39957
	HookEnd	2	60	52.25	1195	13.88	36.805	2.65166
	Steel Corr	0.5	60	50.09	1100	13.88	13.154	0.947695
	Steel Corr	1	60	51.75	1100	13.88	14.267	1.02788
	Steel Corr	1.5	60	52.91	1100	13.88	24.62	1.77378
	Steel Corr	2	60	52.91	1100	13.88	29.52	2.1268
	CS Corr	1.5	40	52.64	1100	13.88	22.8	1.64265
	CL Corr	1.5	80	52.75	1100	13.88	28.122	2.02608
(Yoo et al., 2017)	SS	0.5	65	209	2788	13.8	14	1.01
	SS	1	65	200	2788	10	22.6	2.26
	SS	1.5	65	210	2788	13.5	31.7	2.35
	SS	2	65	220	2788	14.6	36.4	2.49
	SM	0.5	97.5	197	2500	14.5	15.2	1.05
	SM	1	97.5	197	2500	13.5	29.8	2.21
	SM	1.5	97.5	196	2500	17.3	41.7	2.41
	SM	2	97.5	202	2500	15.8	50.9	3.22
	SL	0.5	100	211	2580	12.9	15.5	1.2
	SL	1	100	185	2580	13.4	29.9	2.23
	SL	1.5	100	217	2580	14.5	37.4	2.58
	SL	2	100	219	2580	13.3	42.4	3.19
	HL	0.5	80	187	2500	17.3	17.6	1.02
	HL	1	80	210	2500	17.7	26.7	1.51
	HL	1.5	80	187	2500	16	30.3	1.89
	HL	2	80	189	2500	15.5	34.4	2.22
	TL	0.5	100	195	2428	16.5	18.7	1.13
	TL	1	100	195	2428	15.9	31.5	1.98
	TL	1.5	100	196	2428	16.1	38.3	2.38
	TL	2	100	201	2428	17.5	42.7	2.44
Experimental work for Article1 only								0
								1.21
								1.33
								1.64
								2.44
								2.52
								1.66
								1.73
								2
								2.04
								1.97
								0
								0.62
								0.8
								0.94
								0.95
								0.91
								0
								0.66
								1.19
								1.28
								1.38
								1.17

## Sheet: Sheet2
Vf	l/d	fc	T	MOR/LOP
0	0	48.5387	0	0	0	(G. Ramakrishna and Sundararajan Thirumalai, 2005)
0.5	100	51.3655	1100	1.14141	9.44057
0.5	40	48.4697	1000	1	8.82561
0.5	65	47.0908	1000	0.967742	8.94393
0.5	625	41.87	550	1	8.20339
0	0	48.5387	0	0	0
1	100	57.5018	1000	1.20339	13.071
1	40	47.0908	1000	1	12.2354
1	65	41.8508	1000	1.10067	12.2228
1	65	38.246	1000	1	12.0469
1.5	40	48.3318	1000	1	14.9145
1.5	65	38.8172	1000	1.21023	14.6583
2	40	35.7835	1000	1.00559	16.3046
2	65	38.1277	1000	1.2043	16.7706
2	625	10.12	550	1.011	12.6615
0	0	37.1	0	0	0	(BAŞSÜRÜCÜ et al., 2022)
0.4	66	36.5	1150	1.09663	7.99822
0.4	40	25.1	3000	1.02247	9.4215
0.4	240	17.5	350	0.893258	5.51608
0.8	66	30.5	1150	1.24157	10.8225
0.8	40	22.1	3000	0.97191	12.8562
0.8	240	16.2	350	0.604494	7.58798
0	0	41.1	0	0	0
0.4	66	40.8	1150	1.08045	8.14293
0.4	40	43.5	3000	1.04379	10.2936
0.4	240	30.1	350	0.92057	6.01937
0.8	66	41.7	1150	1.30346	11.3815
0.8	40	45.2	3000	0.936864	14.4259
0.8	240	28.1	350	0.665988	8.29155
0	0	47.53	1300	0	0	(Li et al., 2018b)
0.5	60	49.35	1300	0.986964	9.60166
1	60	51.44	1300	1.15929	13.4629
1.5	60	53.21	1300	1.40497	16.4314
2	60	52.25	1300	1.74359	18.7985
0.5	60	50.76	1195	1.02788	9.44196
1	60	51.92	1195	2.11715	13.1988
1.5	60	53.65	1195	2.39957	16.1064
2	60	52.25	1195	2.65166	18.4022
0.5	60	50.09	1100	0.947695	9.22638
1	60	51.75	1100	1.02788	12.9182
1.5	60	52.91	1100	1.77378	15.7371
2	60	52.91	1100	2.1268	18.057
1.5	40	52.64	1100	1.64265	15.49
1.5	80	52.75	1100	2.02608	15.8978
0.5	65	209	2788	1.01	14.7363	(Yoo et al., 2017)
1	65	200	2788	2.26	20.3799
1.5	65	210	2788	2.35	24.9336
2	65	220	2788	2.49	28.8243
0.5	97.5	197	2500	1.05	14.4141
1	97.5	197	2500	2.21	20.0762
1.5	97.5	196	2500	2.41	24.3499
2	97.5	202	2500	3.22	28.0754
0.5	100	211	2580	1.2	14.7047
1	100	185	2580	2.23	20.0518
1.5	100	217	2580	2.58	24.9736
2	100	219	2580	3.19	28.6975
0.5	80	187	2500	1.02	14.1895
1	80	210	2500	1.51	20.1359
1.5	80	187	2500	1.89	23.9901
2	80	189	2500	2.22	27.5738
0.5	100	195	2428	1.13	14.2979
1	100	195	2428	1.98	19.9142
1.5	100	196	2428	2.38	24.1932
2	100	201	2428	2.44	27.8724
0	0	46.48	0	0	0	Experimental Work
0.413378	625	37.93	4000	1.21	12.1787
0.816157	625	37.54	4000	1.33	16.8302
1.22954	625	36.49	4000	1.64	20.3786
1.66411	625	34.75	4000	2.44	23.3662
2.05629	625	34.04	4000	2.52	25.7676
0.996348	1250	34.89	4000	1.66	18.7725
0.996348	1875	33.35	4000	1.73	18.9183
0.996348	2500	33.13	4000	2	19.1003
0.996348	3125	32.39	4000	2.04	19.1888
0.996348	3750	27.28	4000	1.97	18.7919
0	0	44.67	0	0	0
0.45	375	36.56	500	0.62	7.31069
0.91	375	32.68	500	0.8	10.0531
1.36	375	32	500	0.94	12.1406
1.81	375	38.15	500	0.95	14.3176
2.27	375	29.91	500	0.91	15.3414
0	0	47.21	0	0	0
0.45	71	40.63	550	0.66	7.16256
0.91	71	37.91	550	1.19	9.91767
1.36	71	37.47	550	1.28	11.9951
1.81	71	37.32	550	1.38	13.7424
2.27	71	35.26	550	1.17	15.174
0.406	128	37.96	279	0.242	5.80566
0.81	128	38.19	279	0.607	8.08452
1.21	128	35.68	279	0.94	9.68761
1.6	128	33.21	279	0.82	10.9446
2.03	128	32.05	279	0.99	12.1934
1.44	256	39.48	279	1.03	10.9788
1.44	320	36.72	279	1.39	10.9415
1.44	384	35.03	279	1.41	10.9323
1.44	448	39.17	279	1.46	11.1943
1.44	512	34.77	279	1.45	11.036
